# Supplementary material for: Interventional hydrogel microsphere vaccine as an immune amplifier for activated antitumour immunity after ablation therapy
Source: PubMed Central journal article supplement (PMC10336067; doi:10.1038/s41467-023-39759-w), 2023-07-11
Supplement: 41467_2023_39759_MOESM1_ESM.pdf [file 41467_2023_39759_MOESM1_ESM.pdf]

## **Supplementary Information**

### **Interventional hydrogel microsphere vaccine as an immune amplifier for activated antitumour immunity after ablation therapy**

Xiaoyu Liu, Yaping Zhuang, Wei Huang, Zhuozhuo Wu, Yingjie Chen, Qungang Shan,  
Yuefang Zhang, Zhiyuan Wu, Xiaoyi Ding, Zilong Qiu, Wenguo Cui, Zhongmin Wang

## Supplementary Inventory

**Supplementary Fig. 1.** The physicochemical characterization data of hydrogel microspheres.

**Supplementary Fig. 2.** The characterization of the pH dependence of CD40L release and the concentration of Cas9 plasmid in the hydrogel system.

**Supplementary Fig. 3.** Flow cytometry gating strategy for the analysis of BMDC maturation and activation in vitro.

**Supplementary Fig. 4.** The proliferation and differentiation of bone marrow derived cells towards cDC1s and macrophages.

**Supplementary Fig. 5.** Representative images of CK19- and  $\alpha$ SMA-labelled immunofluorescence staining of pancreas in *Kras*<sup>LSL-G12D</sup>; *Tp53*<sup>fl/-</sup>; *Pdx1*-Cre (KPC) mouse and mouse bearing KPC orthotopic pancreatic tumour.

**Supplementary Fig. 6.** Measurement of the intratumour pH value.

**Supplementary Fig. 7.** Design of the CRISPR gRNAs targeting mouse CD274 gene.

**Supplementary Fig. 8.** Quantification of the Western blotting.

**Supplementary Fig. 9.** Analysis the tumour necrosis, CD8<sup>+</sup> and CD103<sup>+</sup> immune cell infiltration across different treatment groups.

**Supplementary Fig. 10.** Flow cytometry gating strategy for the analysis of tumour-resident DCs.

**Supplementary Fig. 11.** Flow cytometry gating strategy for the analysis of DCs migrated into TdLNs and spleens.

**Supplementary Fig. 12.** Flow cytometry gating strategy for the analysis of OVA<sub>257-246</sub>-H-2Kb-specific tumour-resident cDC1s.

**Supplementary Fig. 13.** Flow cytometry gating strategy for the analysis of the intracellular expression of Ki67, IFN- $\gamma$  and TNF- $\alpha$  in T cells.

**Supplementary Fig. 14.** Representative images of CD8- and CD4-labelled immunofluorescence staining of pancreas lymph nodes (pLNs) in tumour bearing mice.

**Supplementary Fig. 15.** The density of cDC1s was correlated with the density of activated CD8<sup>+</sup> T cells in TdLNs.

**Supplementary Fig. 16.** Flow cytometry gating strategy for the analysis of (a) tumour-infiltrating Ly6G<sup>+</sup>CD11b<sup>+</sup> myeloid cells and NK1.1<sup>+</sup> cells and (b) quantification analysis.

**Supplementary Fig. 17.** Flow cytometry gating strategy for immune phenotyping of the macrophages.

**Supplementary Fig. 18.** Flow cytometry gating strategy for the analysis of tumour-infiltrating FoxP3<sup>+</sup>CD25<sup>+</sup> Tregs, Ki67<sup>+</sup>CD8<sup>+</sup> T cells, and IFN- $\gamma$ <sup>+</sup>CD8<sup>+</sup> T cells.

**Supplementary Fig. 19.** Representative H&E staining images of major organs in KPC orthotopic tumour bearing mice receiving different therapies.

**Supplementary Fig. 20.** The efficacy of intravenous delivery of  $\alpha$ CD40 and FLT3L against KPC tumour.

**Supplementary Fig. 21.** Flow cytometry gating strategy for the analysis of CD8<sup>+</sup> T cells, CD4<sup>+</sup> T cells, CD24<sup>+</sup>MHC II<sup>+</sup>DC-like cells and CD103<sup>+</sup> cDC1-like cells in circulation.

**Supplementary Fig. 22.** Representative images show the gross distant metastasis tumours across different groups.

**Supplementary Fig. 23.** Western Blot assay demonstrating the expression level molecular markers in KPC and Panc02 cells, and the expression of PD-L1 in IFN- $\gamma$  treatment Panc02 cells.

**Supplementary Table 1. Antibody information.**

## Supplementary Fig. 1

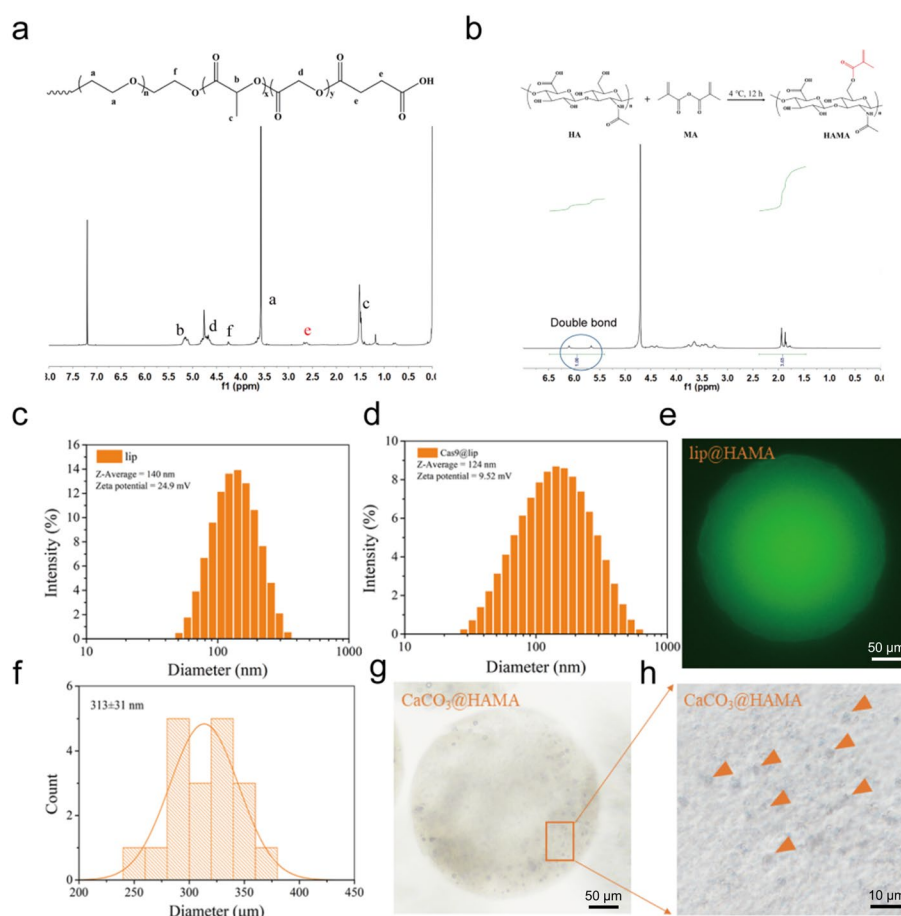

**Supplementary Fig. 1. The physicochemical characterization data of hydrogel microspheres.** (a) The  $^1\text{H}$  nuclear magnetic resonance ( $^1\text{H}$  NMR) spectrum of the terminal modified PLGA-PEG-PLGA, the signal peak in the nuclear magnetic spectrum ( $^1\text{H}$  NMR) at a chemical shift of 2.68 ppm attributable to methylene protons ( $-\text{CH}_2\text{CH}_2-$ ) of the succinyl unit. (b) The  $^1\text{H}$  nuclear magnetic resonance ( $^1\text{H}$  NMR) spectrum of HAMA, the signal peaks at 5.66 and 6.10 PPM were attributable to methacrylate anhydride's double bond hydrogen, with a double bond modification rate of 69.8%. (c) Hydrodynamic diameter of the lip; (d) Hydrodynamic diameter and zeta potential of the Cas9@lip; (e) Fluorescence photograph of FITC@lip/HAMA hydrogel microspheres; (f) The particle size statistics of hydrogel microspheres by image J; (g) The photograph of  $\text{CaCO}_3$ @HAMA hydrogel microspheres; (h) The enlarged image of  $\text{CaCO}_3$ @HAMA hydrogel microspheres. Source data are provided as a Source data file.



## Supplementary Fig. 2

a

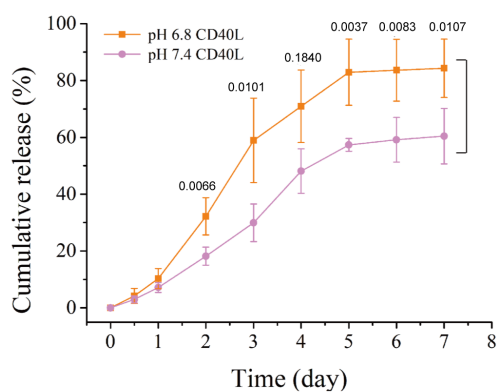

b

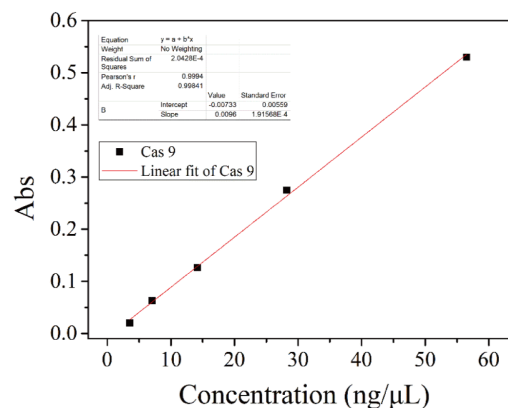

**Supplementary Fig. 2. The characterization of the pH dependence of CD40L release and the concentration of Cas9 plasmid in the hydrogel system. (a)** The release of CD40L from CD40L@CaCO<sub>3</sub>/Flt3L/Cas9@lip/HAMA hydrogel microsphere at pH value of 6.8 and 7.4 in 1×PBS solution. n=3 independent experiments. Data are presented as mean values +/- SD. Two-tailed unpaired t-test. **(b)** The standard curve of Cas9 plasmid DNA according to UV absorption analysis. Data are presented as linear regression. Source data are provided as a Source data file.

Supplementary Fig. 3

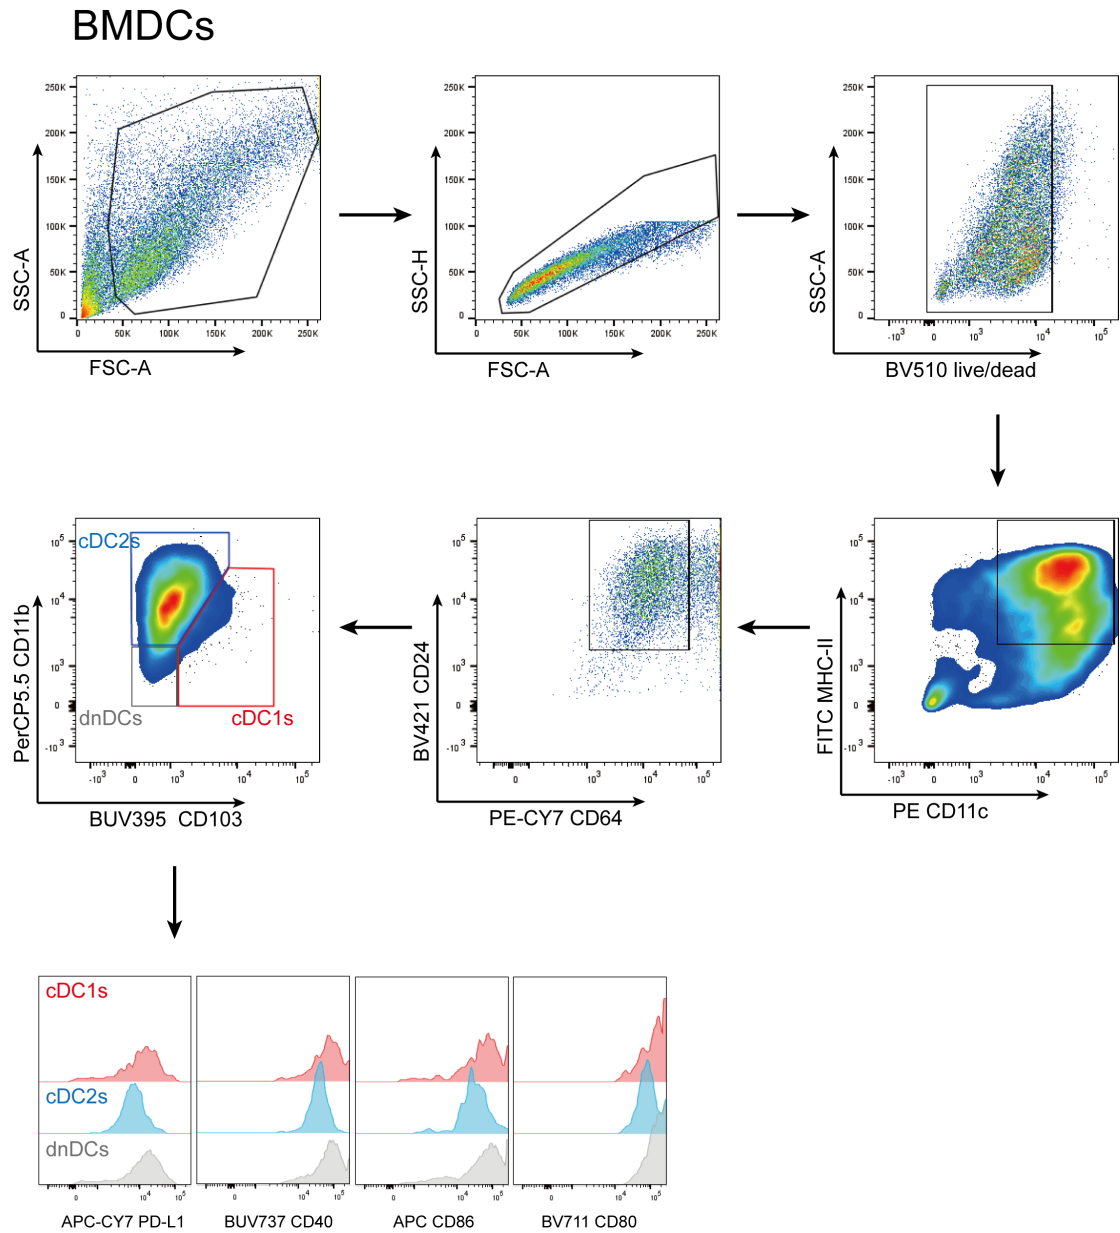

**Supplementary Fig. 3. Flow cytometry gating strategy for the analysis of BMDC maturation and activation *in vitro*.** The gating strategy identifies CD103<sup>+</sup> CD11b<sup>-</sup> cDC1s, CD103<sup>-</sup> CD11b<sup>+</sup> cDC2s, CD103<sup>-</sup> CD11b<sup>-</sup> DCs (dnDCs) and the level of costimulators (Fig. 2q).

## Supplementary Fig. 4

**a**

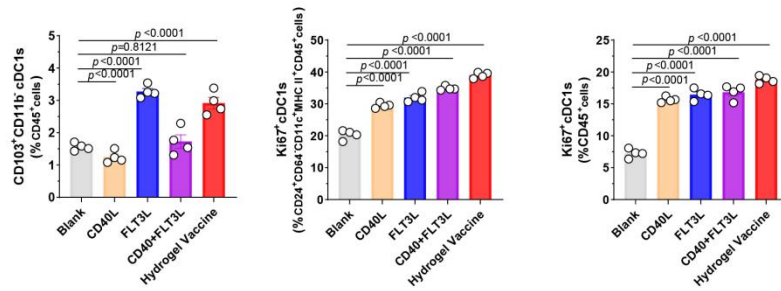

**b**

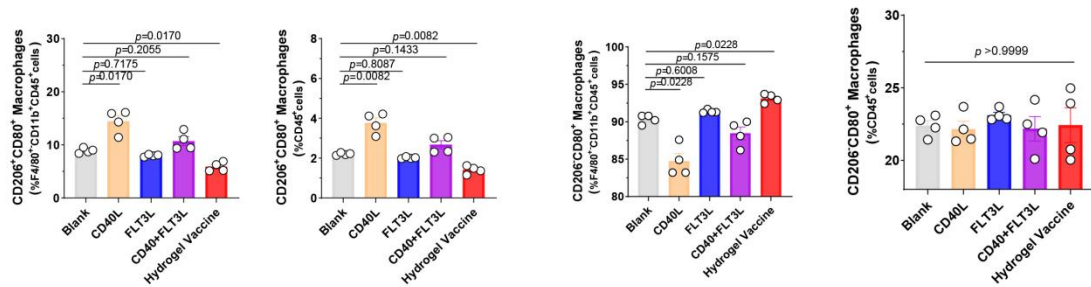

**c**

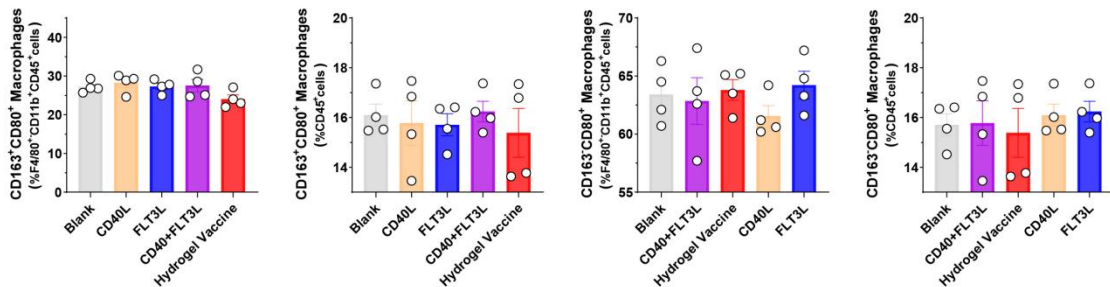

**Supplementary Fig. 4. The proliferation and differentiation of bone-marrow derived cells towards cDC1s and macrophages.** (a) Analysis of the effect of hydrogel microsphere vaccines and the counterparts on the differentiation and proliferation in cDC1s; (b-c) Analysis of the effect of hydrogel microsphere vaccines and the counterparts on the differentiation of BMDC into macrophages. The CD163<sup>+</sup>CD80<sup>+</sup> macrophages and CD206<sup>+</sup>CD80<sup>+</sup> macrophages represented the M2-like macrophages. The CD163<sup>-</sup>CD80<sup>+</sup> macrophages and CD163<sup>-</sup>CD80<sup>-</sup> macrophages represented the M1-like macrophages. For a-c, n=4 biologically independent samples. data are presented as mean values +/- SEM. Two-tailed Dunnett t-test. Source data are provided as a Source data file.

Supplementary Fig. 5

a

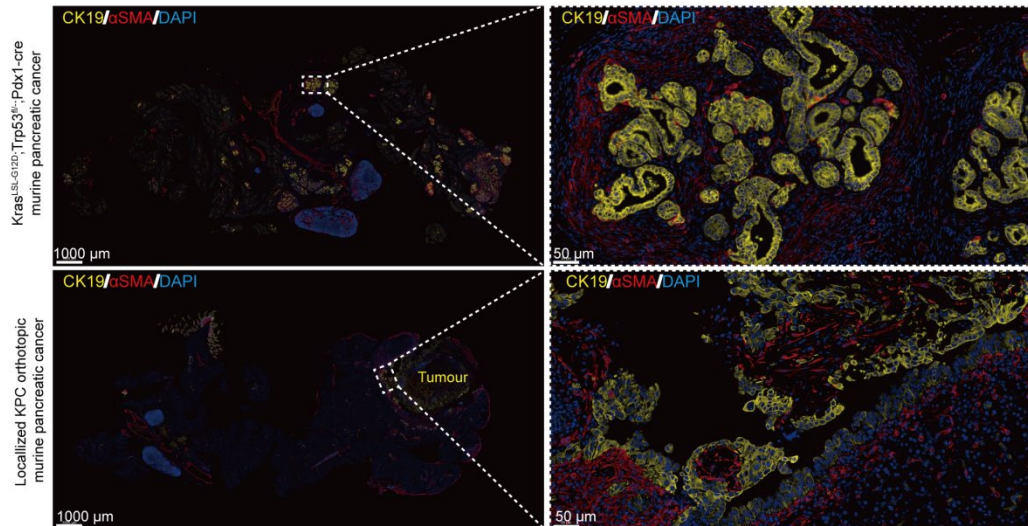

b

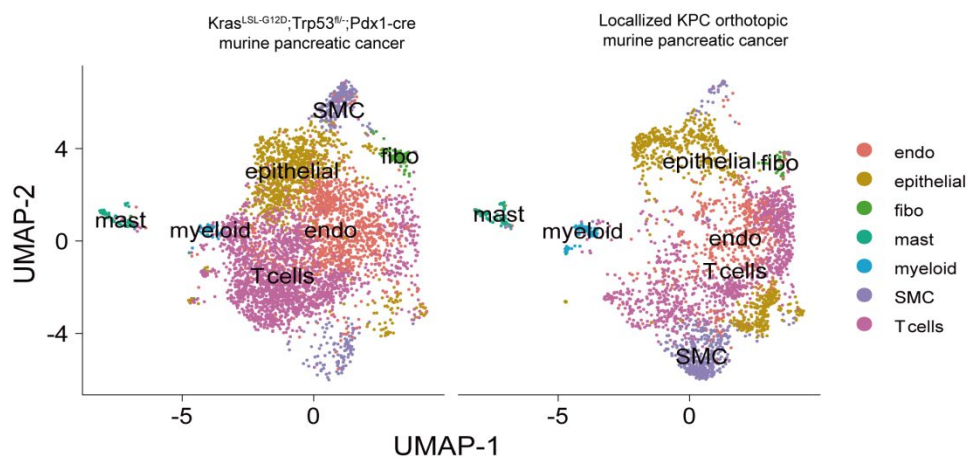

**Supplementary Fig. 5. Representative images of CK19- and  $\alpha$ SMA-labelled immunofluorescence staining of pancreas in Kras<sup>LSL-G12D</sup>; Tp53<sup>fl/-</sup>; Pdx1-Cre (KPC) mouse and mouse bearing KPC orthotopic pancreatic tumour. (a) Representative images of CK19- and  $\alpha$ SMA-labelled immunofluorescence staining. 3 biologically independent samples were performed to confirm data stability. (b) Single-cells analysis demonstrated the tumour-infiltrating immune cells of pancreatic cancers in KPC genetic mouse and mouse bearing KPC orthotopic pancreatic tumours. Source data are provided as a Source data file.**

Supplementary Fig. 6

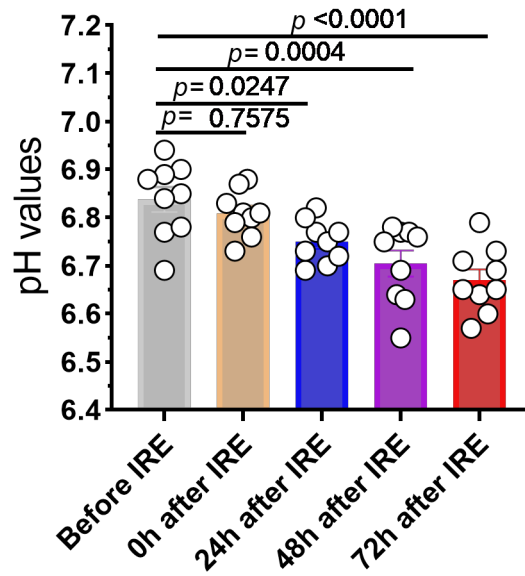

**Supplementary Fig. 6. Measurement of the intratumour pH value.** The intratumour pH value before and after the IRE therapy. There were three mice in each group, and each tumour was tested for three times. n=9 biologically independent samples. data are presented as mean values +/- SEM. Two-tailed Dunnett t-test. Source data are provided as a Source data file.

**Supplementary Fig. 7**

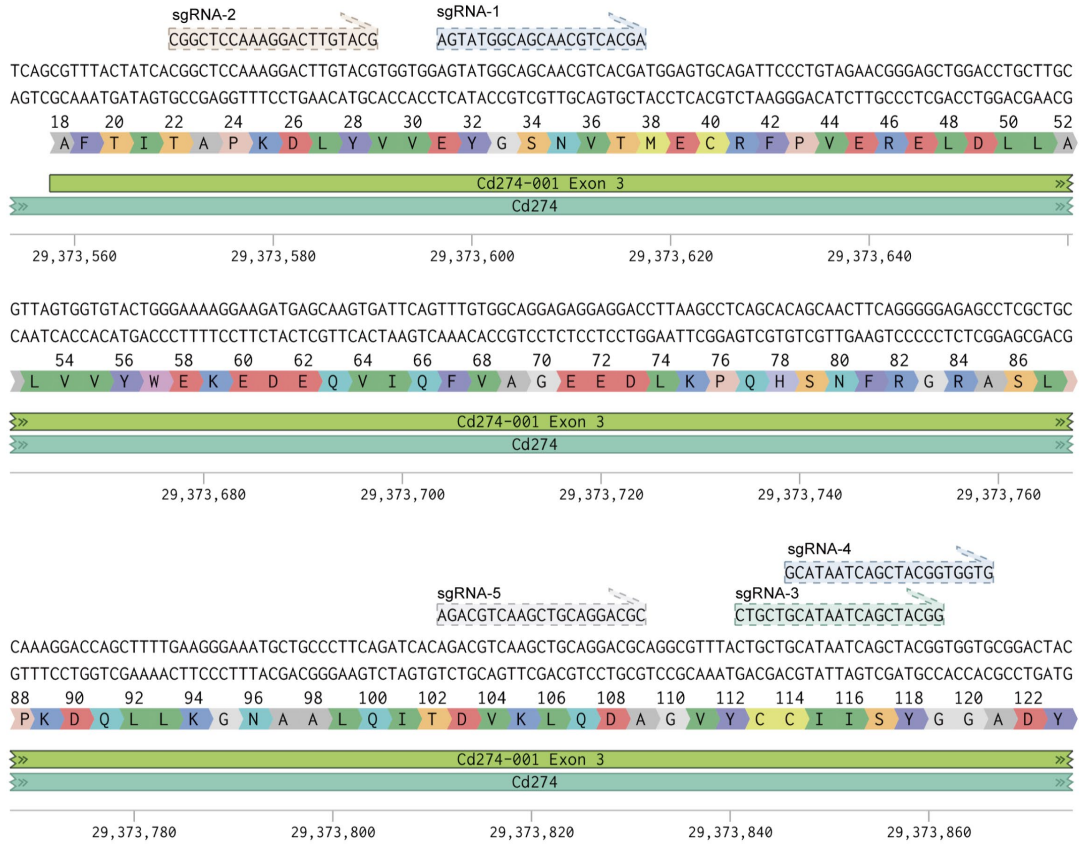

**Supplementary Fig. 7. Design of the CRISPR gRNAs targeting mouse CD274 gene.**

Supplementary Fig. 8

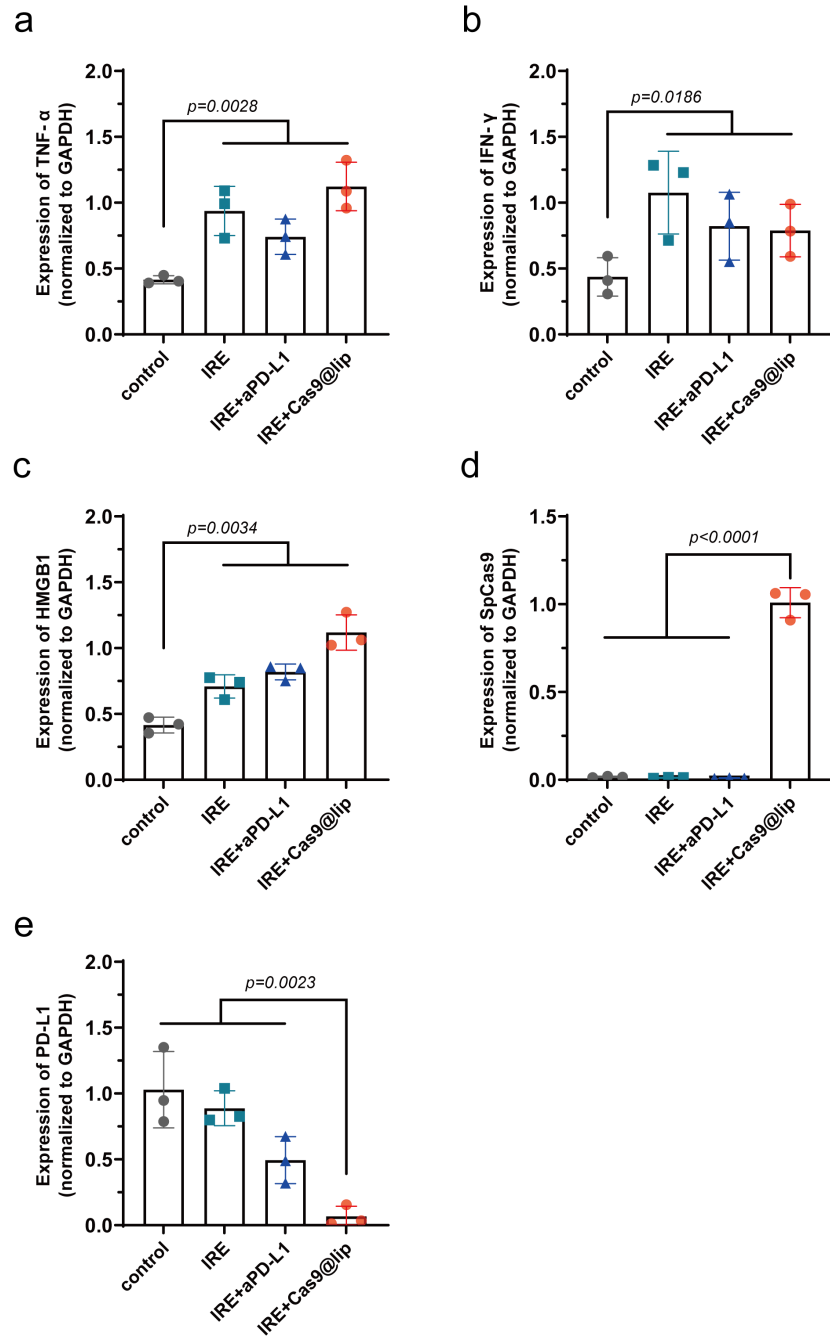

**Supplementary Fig. 8. Quantification of the Western blotting.** (a-e) Quantification the expression of TNF- $\alpha$  (a), IFN- $\gamma$  (b), HMGB1 (c) and PD-L1 (d) and extrinsic SpCas9 (e) across different experimental groups. For a-e, n=3 biologically independent experiments. Data are presented as mean values +/- SEM. Two-tailed unpaired t-test. Source data are provided as a Source data file.



Supplementary Fig. 9

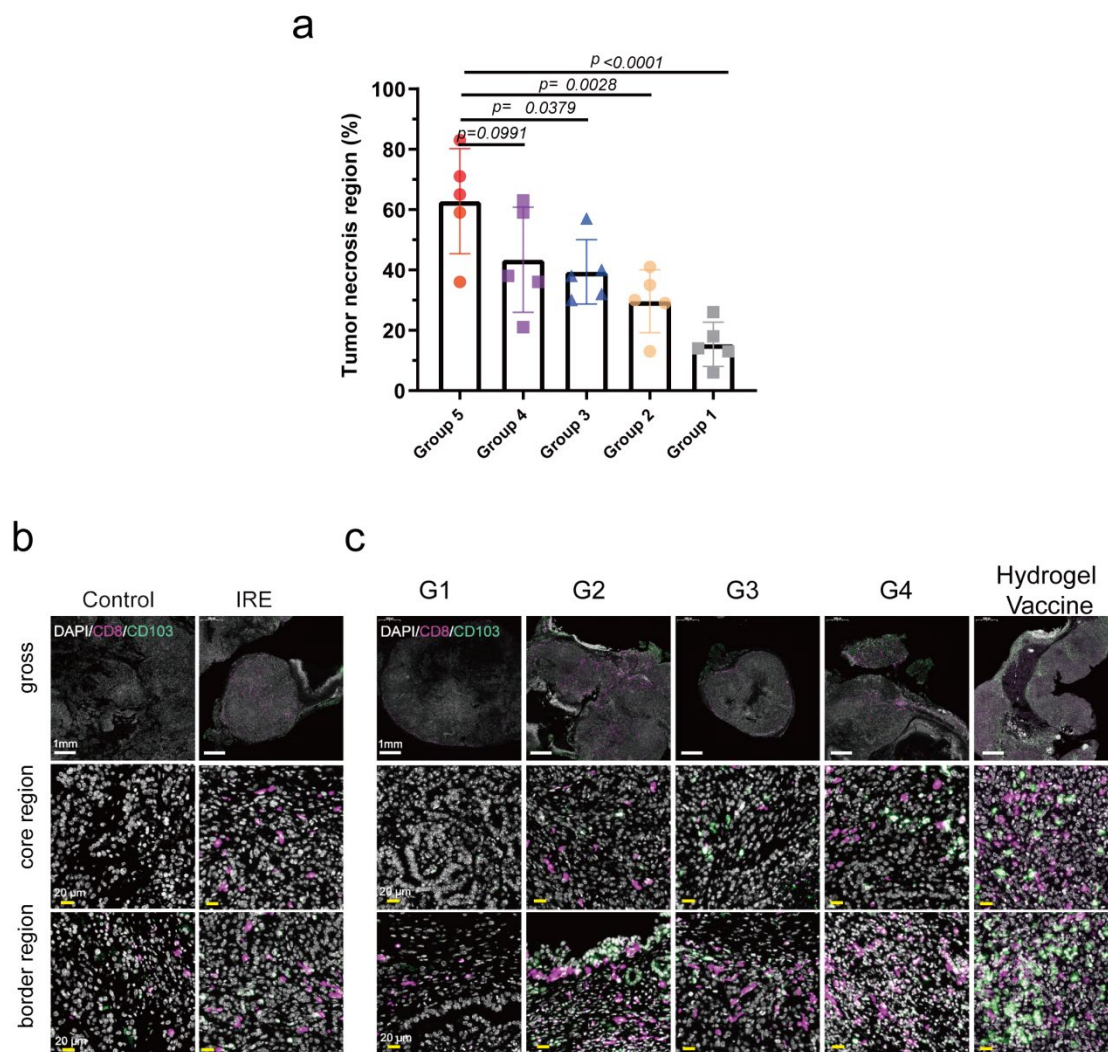

**Supplementary Fig.9. Analysis the tumour necrosis, CD8<sup>+</sup> and CD103<sup>+</sup> immune cell infiltration across different treatment groups.** (a) Statistic data showed the tumour necrosis area according to the H&E staining for tumour bearing mice treated with IRE and different hydrogel microspheres. n=5 biologically independent samples. Data are presented as mean values +/- SEM. Two-tailed Dunnett t-test. (b-c) Representative image of immunofluorescence staining represented the CD8<sup>+</sup> and CD103<sup>+</sup> immune cell infiltration across different treatment groups. For b and c, 5 biologically independent samples were performed to confirm data stability. Source data are provided as a Source data file.



## Supplementary Fig. 10

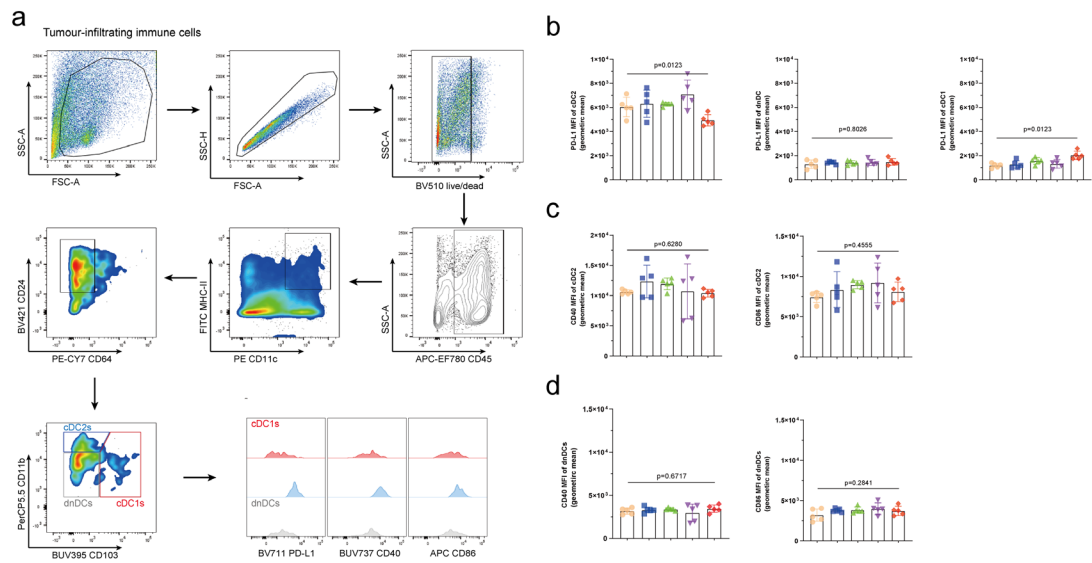

### Supplementary Fig.10. Flow cytometry gating strategy for the analysis of tumour-resident

**DCs. (a)** The gating strategy of flow cytometry experiments to identify tumour-resident  $CD103^+CD11b^-$  cDC1s,  $CD103^-CD11b^+$  cDC2s,  $CD103^-CD11b^-$  DCs (dnDCs) and the level of costimulators (Fig 4d, e, f and Supplementary Fig.10 b-d). **(b)** Flow cytometry analysis showed that cDC2s were the major PD-L1 expressing cell. **(c)** The expression of costimulators (CD40 and CD86) on tumour-resident cDC2s across different groups. **(d)** The expression of costimulators (CD40 and CD86) on tumour-resident dnDCs across different groups. For **b-d**,  $n=5$  biologically independent samples. Data are presented as mean values  $\pm$  SEM. Two-tailed one-way ANOVA. Source data are provided as a Source data file.

**Supplementary Fig. 11**

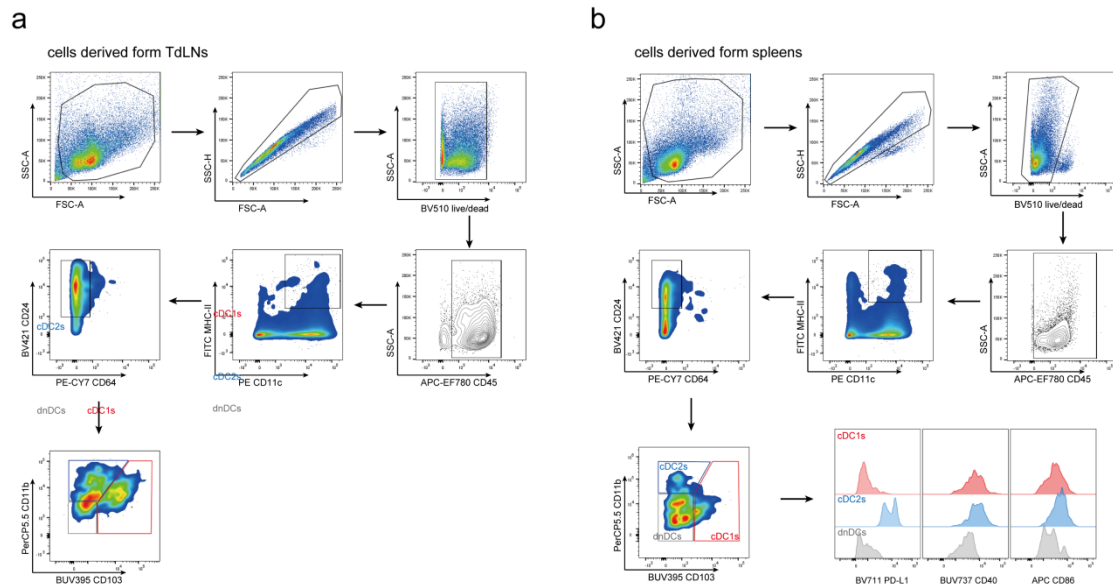

**Supplementary Fig. 11. Flow cytometry gating strategy for the analysis of DCs migrated into TdLNs and spleens. (a)** The gating strategy of flow cytometry experiments to identify different DCs and the level of costimulators for TdLNs (Fig. 4i, k). **(b)** The gating strategy of flow cytometry experiments to identify different DCs and the level of costimulators for spleens (Fig. 4j, l).

## Supplementary Fig. 12

TILs

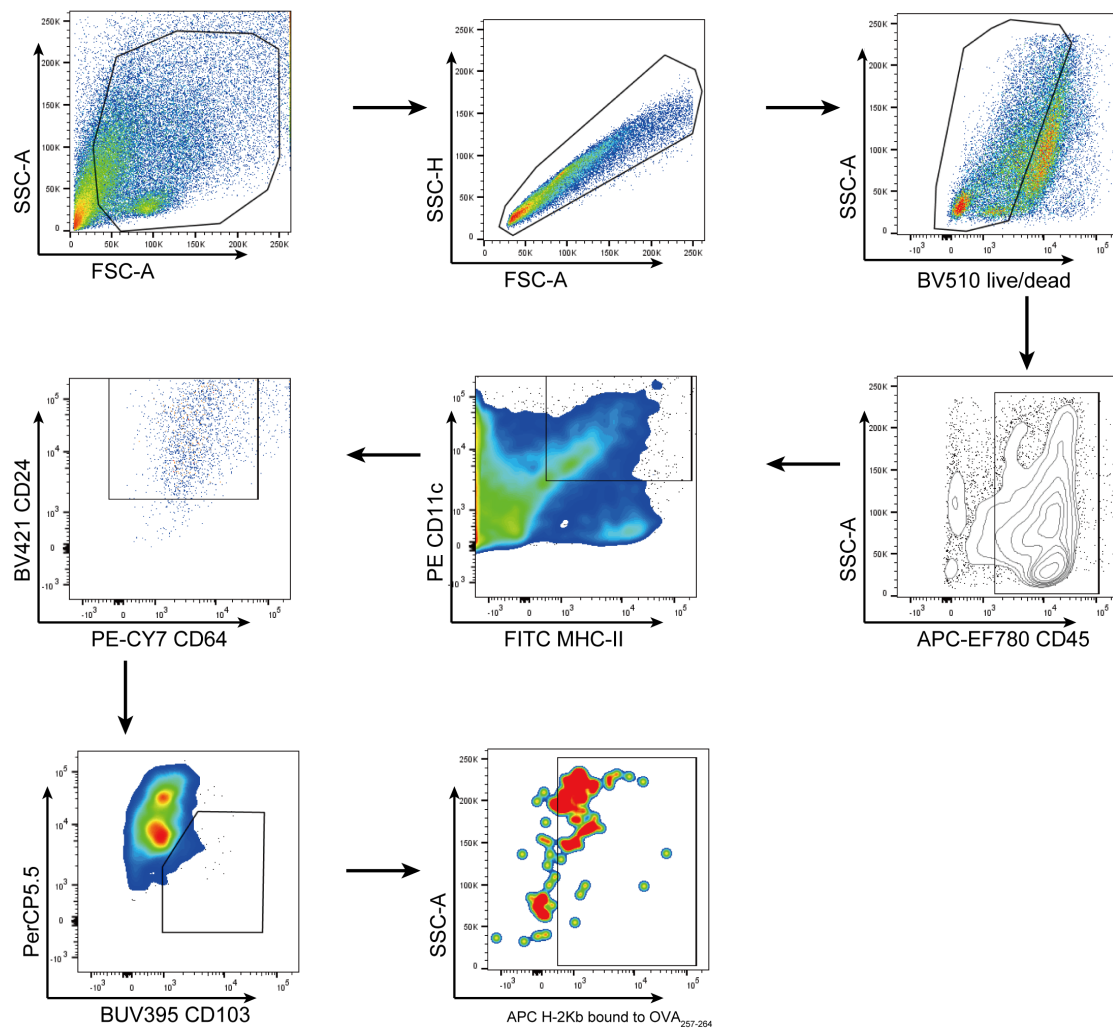

**Supplementary Fig. 12. Flow cytometry gating strategy for analysis of OVA<sub>257-246</sub>-H-2Kb specific tumour-resident cDC1s (Fig. 4n).**

**Supplementary Fig. 13**

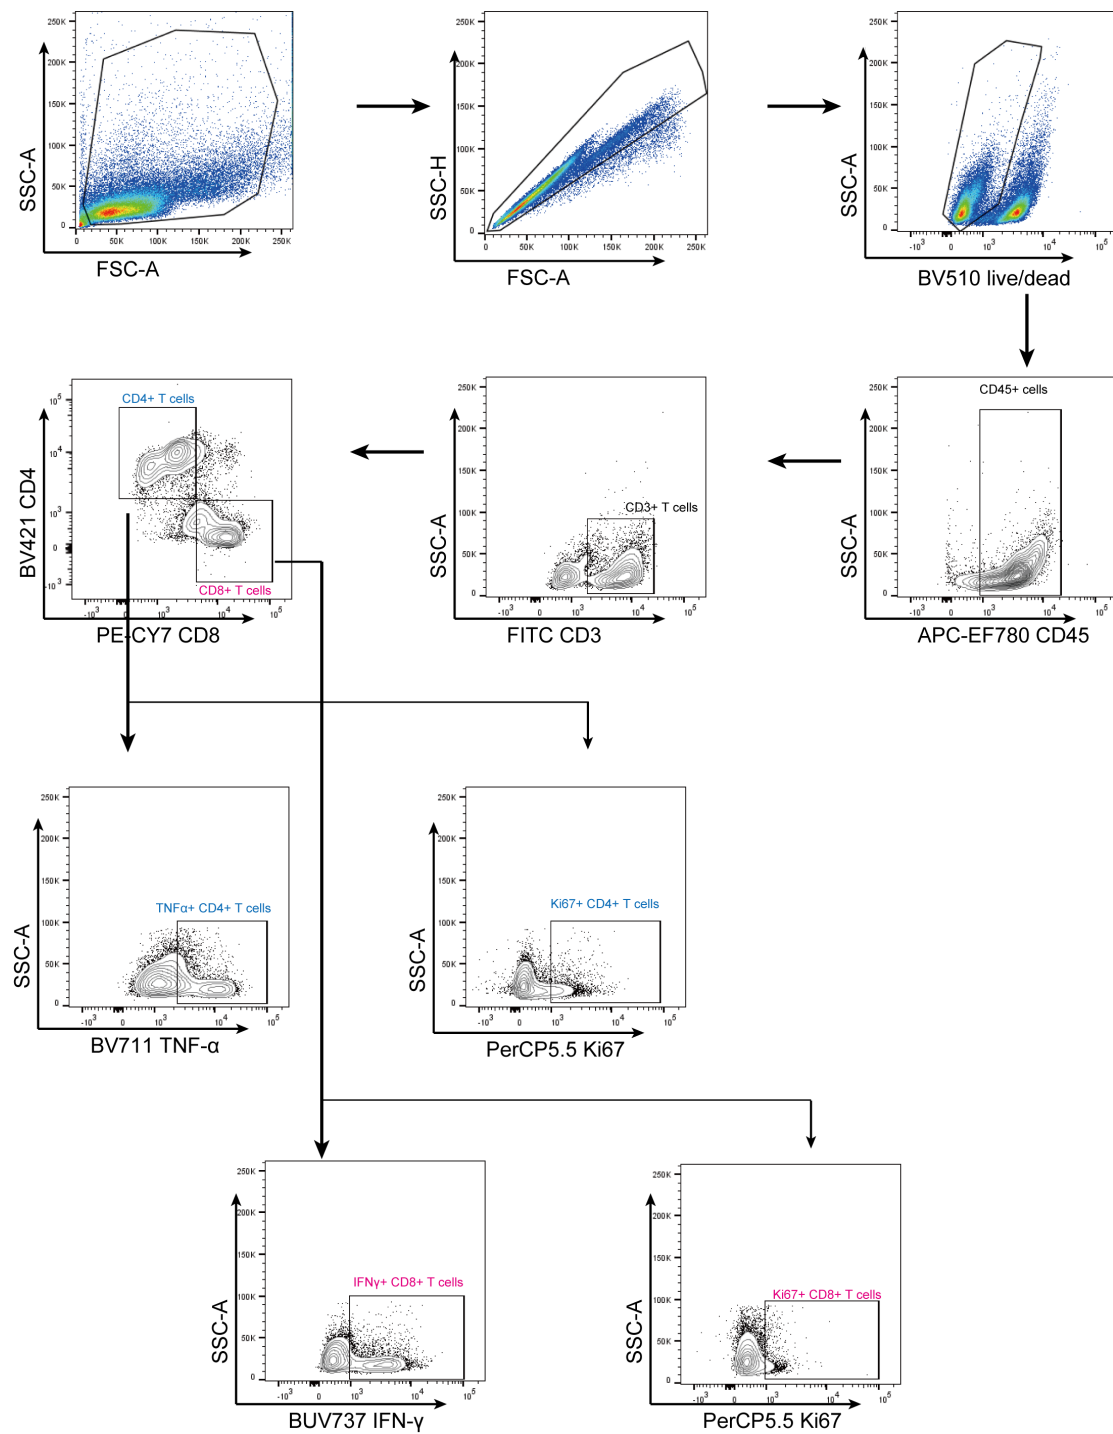

**Supplementary Fig. 13. Flow cytometry gating strategy for the analysis of the intracellular expression of Ki67, IFN- $\gamma$  and TNF- $\alpha$  in T cells (Fig. 5a, b and d-f).**

Supplementary Fig. 14

a

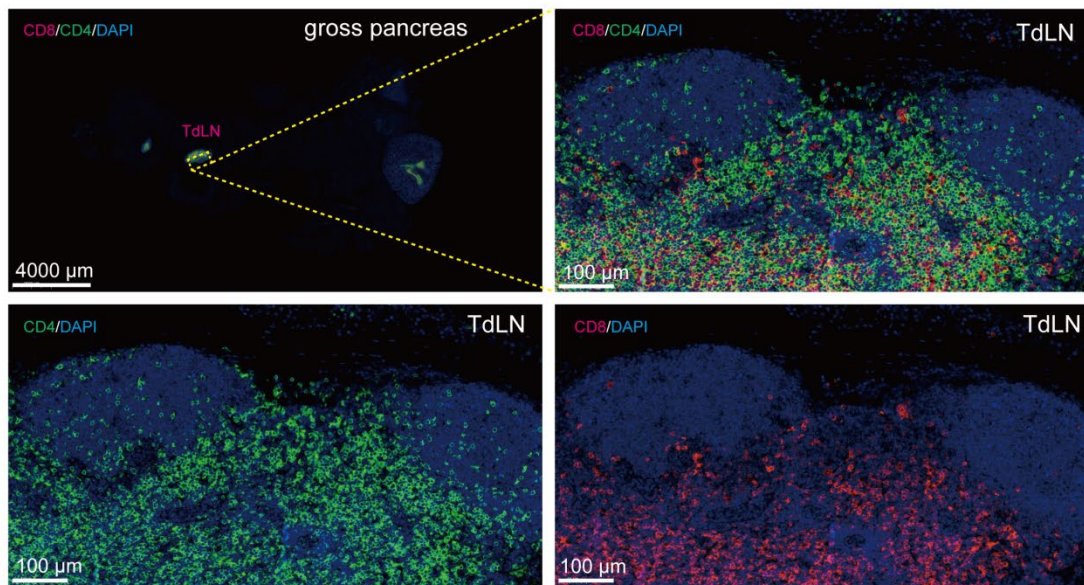

b

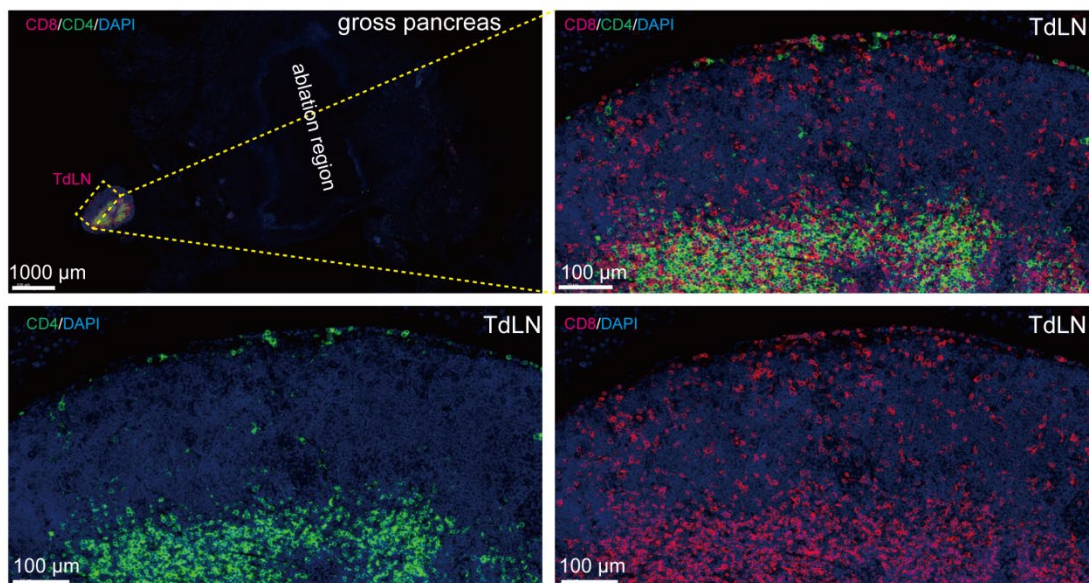

**Supplementary Fig. 14. Representative images of CD8- and CD4-labelled immunofluorescence staining of pancreas lymph nodes (pLNs) in tumour bearing mice.** Representative images showed CD8- and CD4-positive cells in pLNs in KPC tumour-bearing mice receiving (a) IRE monotherapy or (b) combination of IRE and hydrogel microsphere vaccine. Source data are provided as a Source data file. For a and b, 5 biologically independent samples were performed to confirm data stability.

### Supplementary Fig. 15

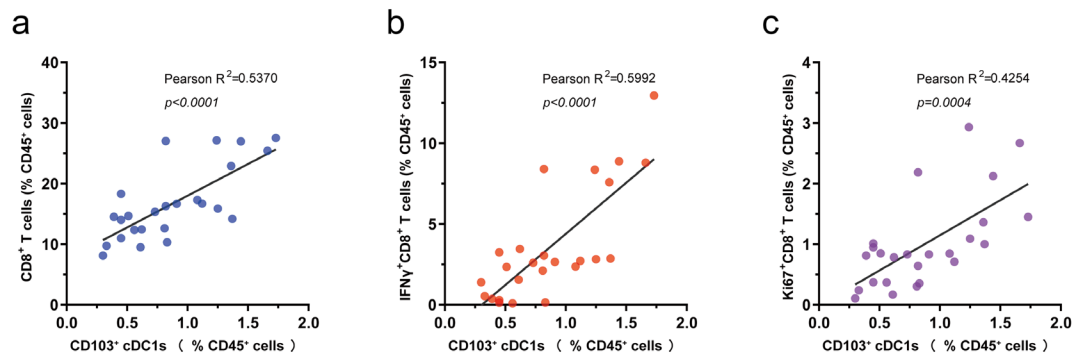

**Supplementary Fig. 15. The density of cDC1s was correlated with the density of activated CD8<sup>+</sup> T cells in TdLNs.** The correlation between the density of CD8<sup>+</sup> T cells (a), Ki67<sup>+</sup>CD8<sup>+</sup> T cells (b), IFN- $\gamma$ <sup>+</sup>CD8<sup>+</sup> T cells (c) and the density of cDC1s in the TdLNs. n=25 biological independent samples, data are tested using Pearson's test with two-tailed p values. Source data are provided as a Source data file.



**Supplementary Fig. 16**

**a**

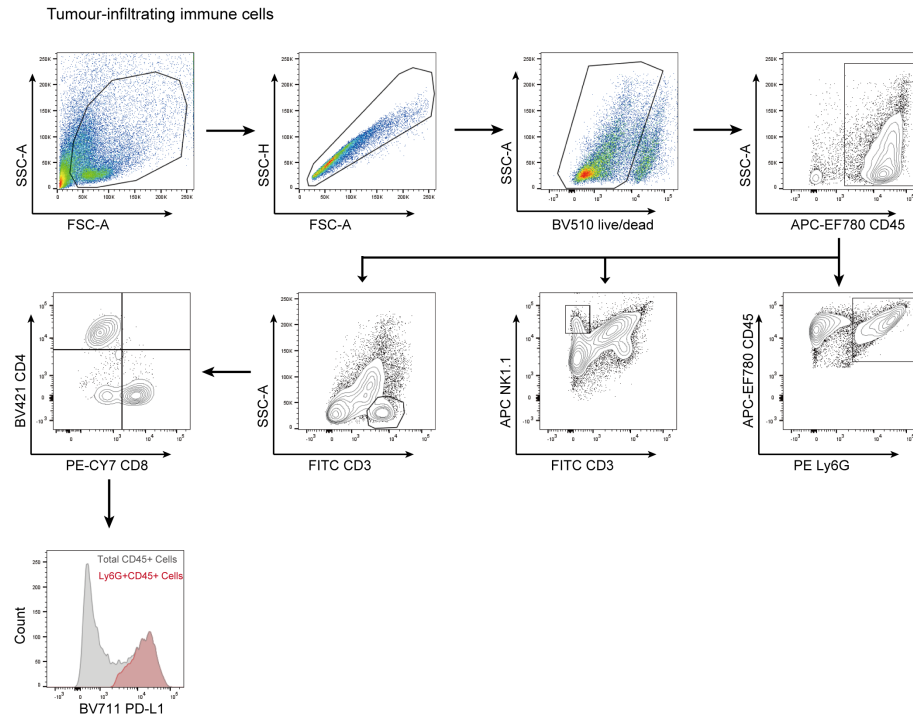

**b**

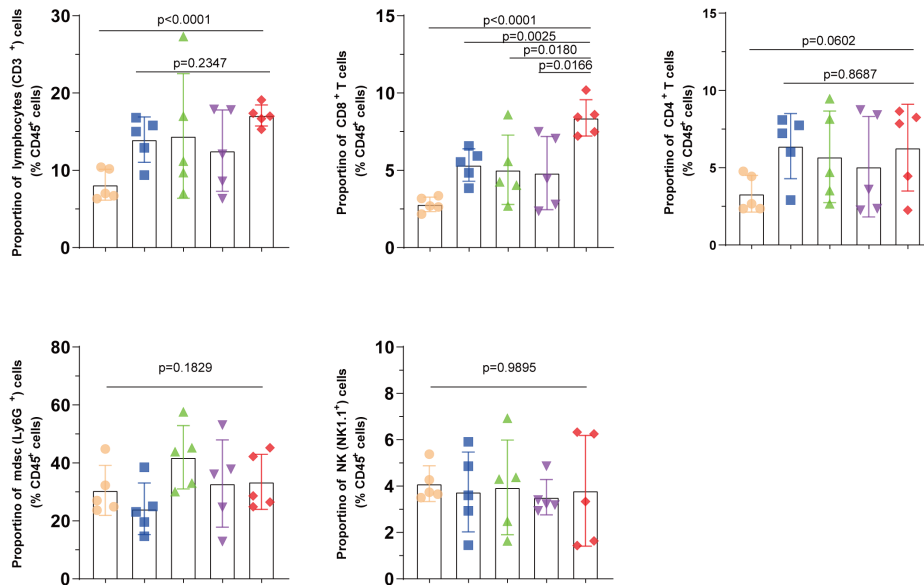

**Supplementary Fig. 16. Flow cytometry gating strategy for the analysis of (a) tumour-infiltrating Ly6G<sup>+</sup>CD11b<sup>+</sup> myeloid cells and NK1.1<sup>+</sup> cells and (b) quantification analysis (Fig. 5d-e and Supplementary Fig. 16b). For b, n=5 biologically independent samples. Data are presented as mean values +/- SEM. Two-tailed unpaired t-test for the upper panel, and two-tailed one-way ANOVA for the bottom panel. Source data are provided as a Source data file.**

**Supplementary Fig. 17**

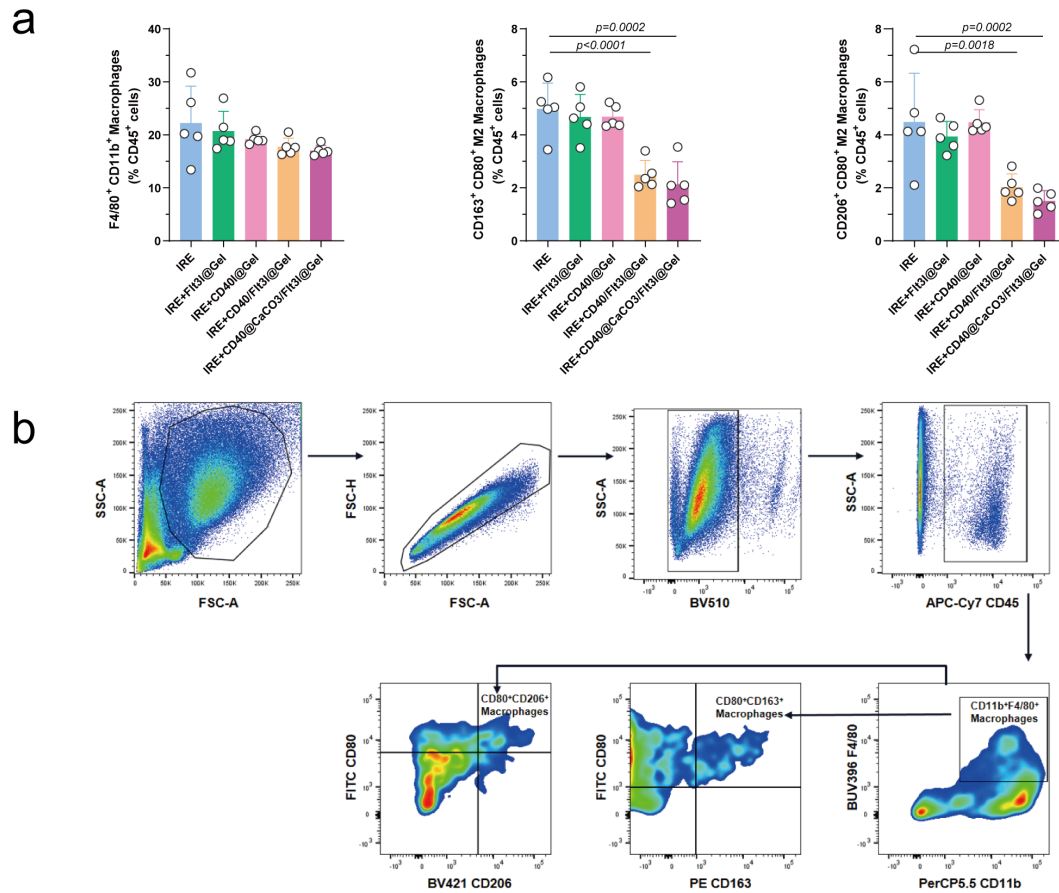

**Supplementary Fig. 17. Flow cytometry gating strategy for immune phenotyping of the macrophages.** (a) Statistical analysis revealed no differences in the proportion of total F4/80<sup>+</sup> macrophages in orthotopic pancreatic tumours across different treatment groups, while the M2-like immunosuppressive macrophages (CD163<sup>+</sup>CD80<sup>+</sup> macrophages and CD206<sup>+</sup>CD80<sup>+</sup> macrophages) slightly reduced after the CD40L and FLT3L combination treatment. n=5 biologically independent samples. Data are presented as mean values +/- SEM. Two-tailed Dunnett t-test. (b) The flow cytometry gating strategy for macrophages (Supplementary Fig. 17a). The CD206<sup>+</sup>CD80<sup>+</sup> and CD163<sup>+</sup>CD80<sup>+</sup> macrophage represented for the M2-like macrophages, and the CD206<sup>-</sup>CD80<sup>+</sup> and CD163<sup>-</sup>CD80<sup>+</sup> macrophage represented for the M2-like macrophages. Source data are provided as a Source data file.



## Supplementary Fig. 18

Tumour-infiltrating immune cells

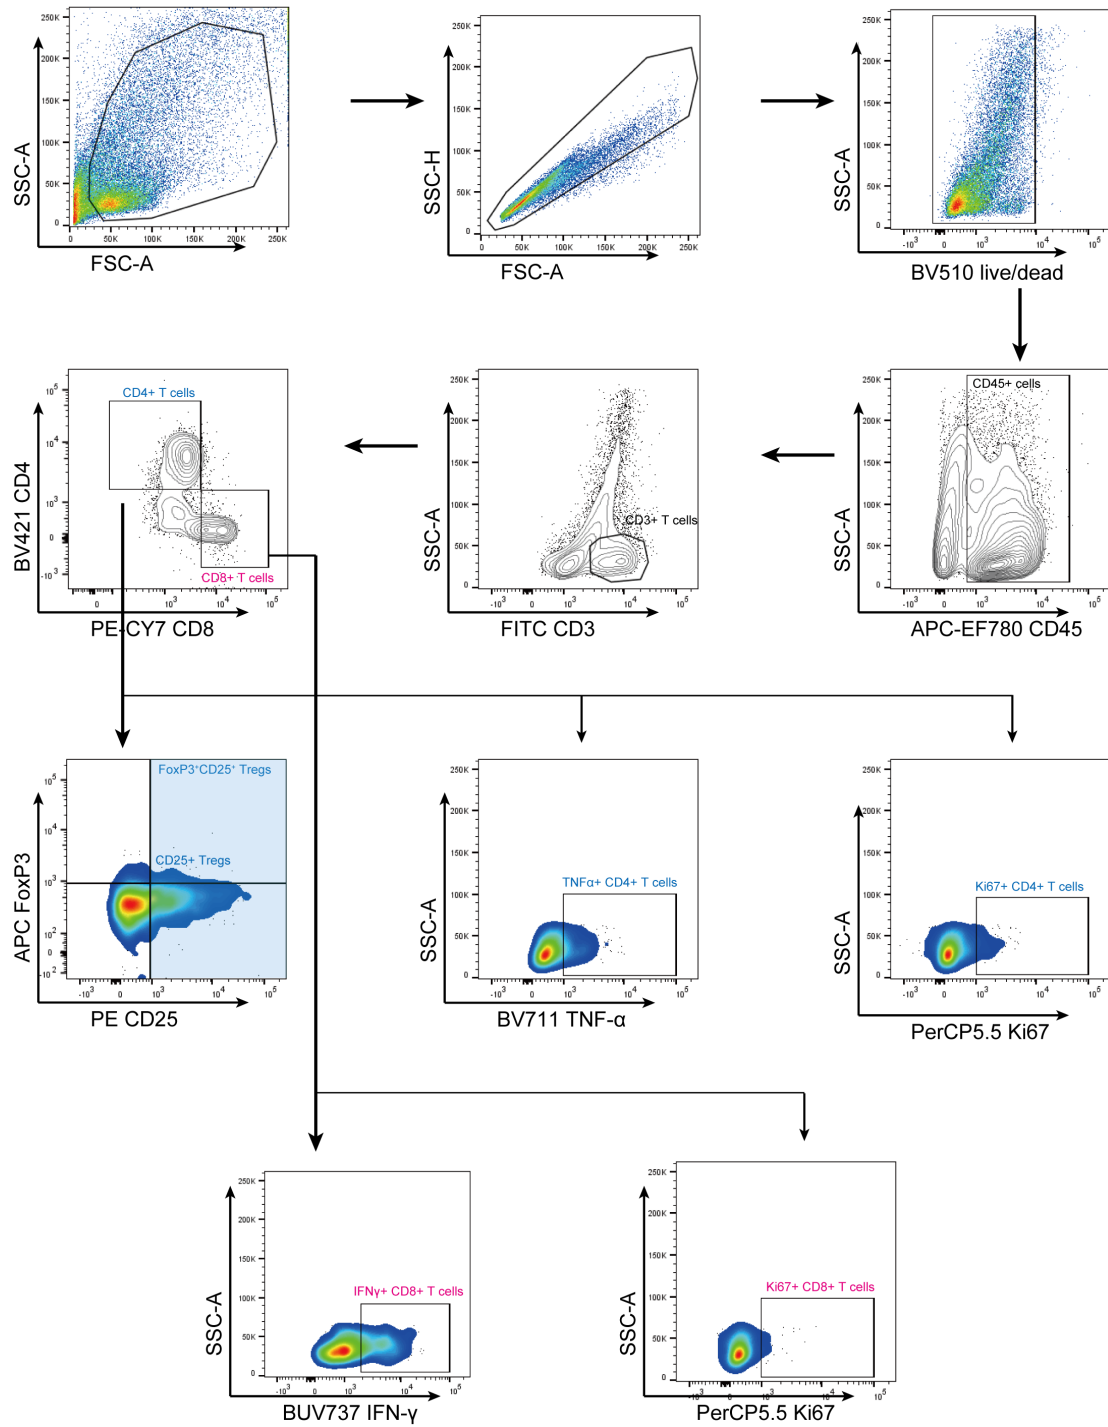

Supplementary Fig. 18. Flow cytometry gating strategy for the analysis of tumour-infiltrating FoxP3<sup>+</sup>CD25<sup>+</sup> Tregs, Ki67<sup>+</sup>CD8<sup>+</sup> T cells, and IFN-γ<sup>+</sup>CD8<sup>+</sup> T cells (Fig. 5f).

### Supplementary Fig. 19

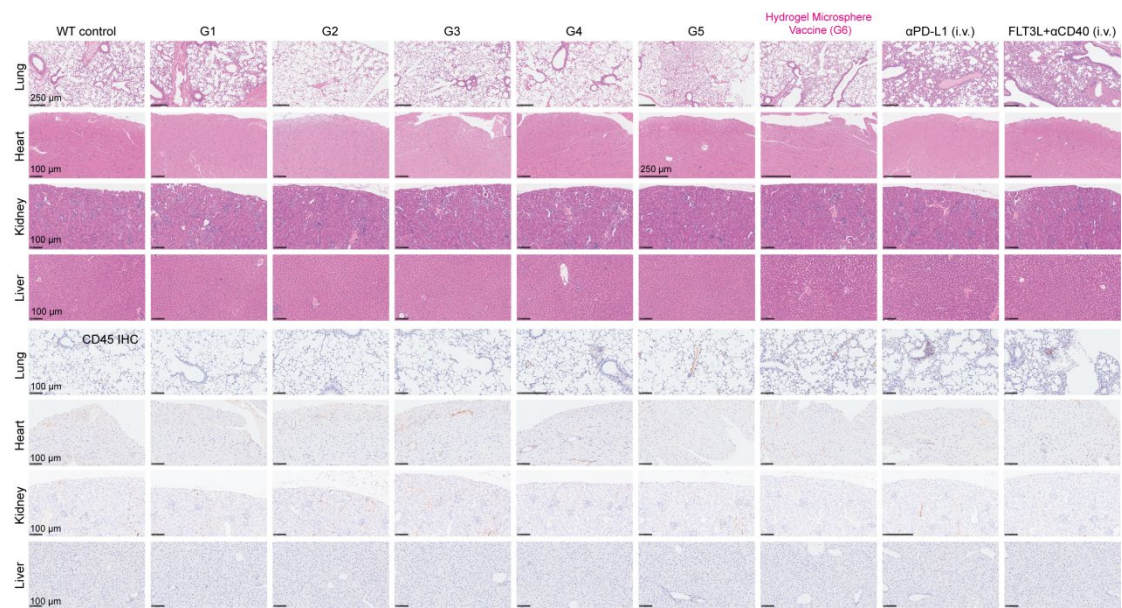

**Supplementary Fig. 19. Representative H&E staining images of major organs in KPC orthotropic tumour bearing mice receiving different therapies.** No obvious signs of organ damage appeared in hydrogel microspheres treated mice. Sporadic inflammatory responses were observed in the lungs of mice receiving i.p injection of  $\alpha$ CD40 and FLT3L cytokines. 5 biologically independent samples were performed to confirm data stability. Source data are provided as a Source data file.

## Supplementary Fig. 20

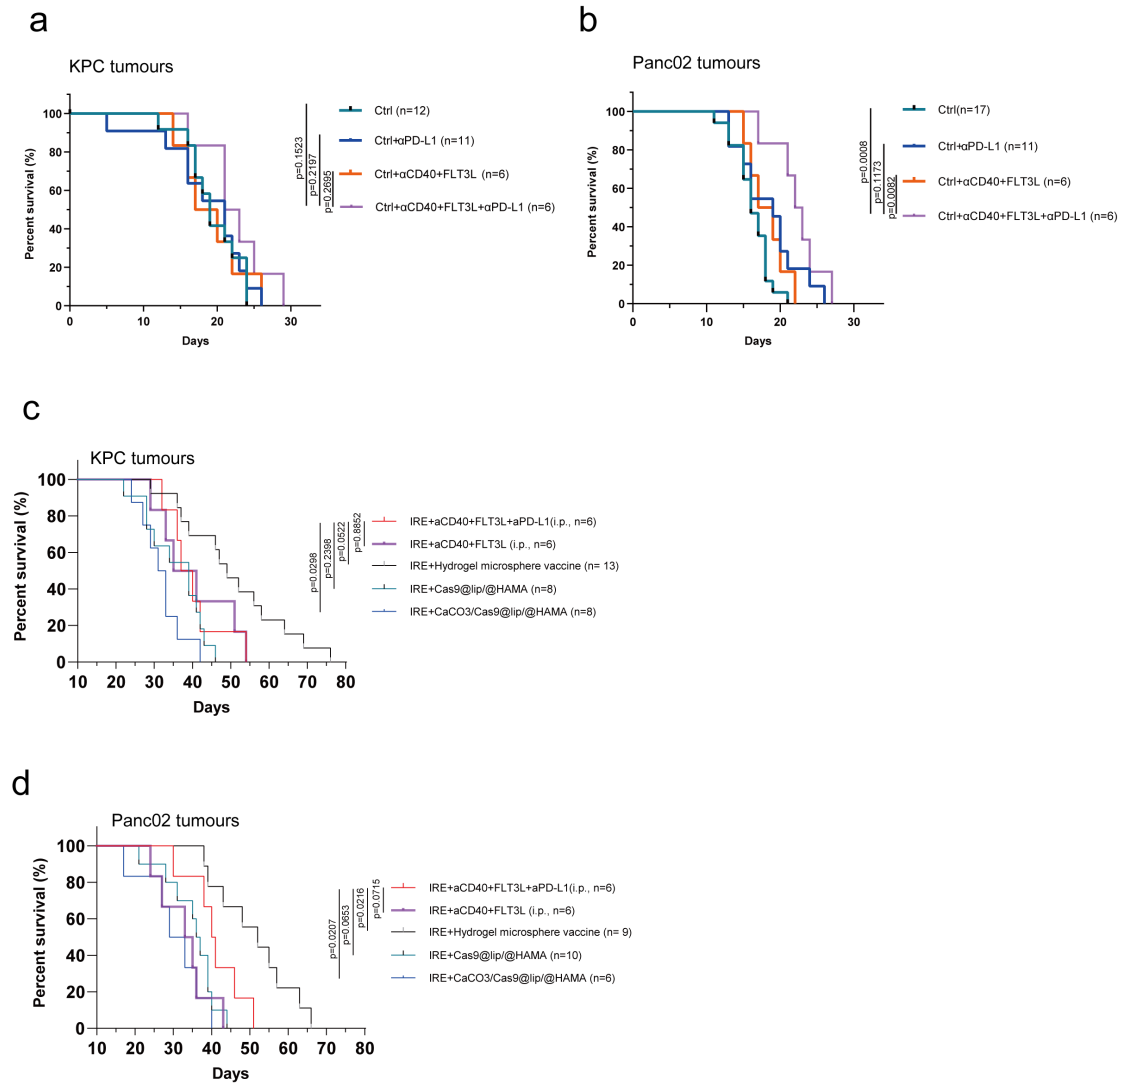

**Supplementary Fig. 20. The efficacy of intravenous delivery of  $\alpha$ CD40 and FLT3L against KPC tumour.** The survival data of control group, control+ $\alpha$ PD-L1 group (**a-b**), IRE+vaccine (different counterparts in **c-d**) group were related to survival analyses in **Fig. 3** and **Fig. 6**. Sample size for each group is labelled in the figure. Survival data are analyzed using Kaplan-Meier Method. Two-tailed log-rank test. Source data are provided as a Source data file.

Supplementary Fig. 21

a

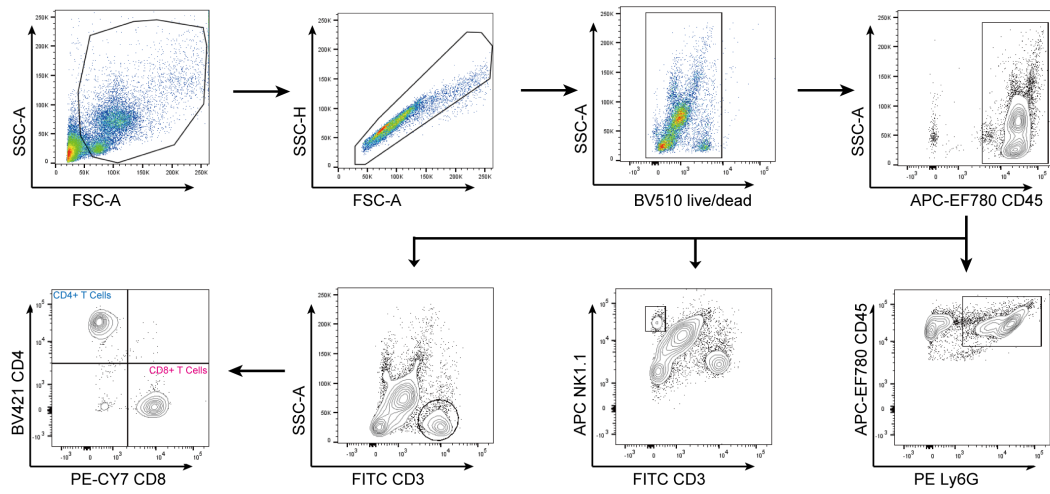

b

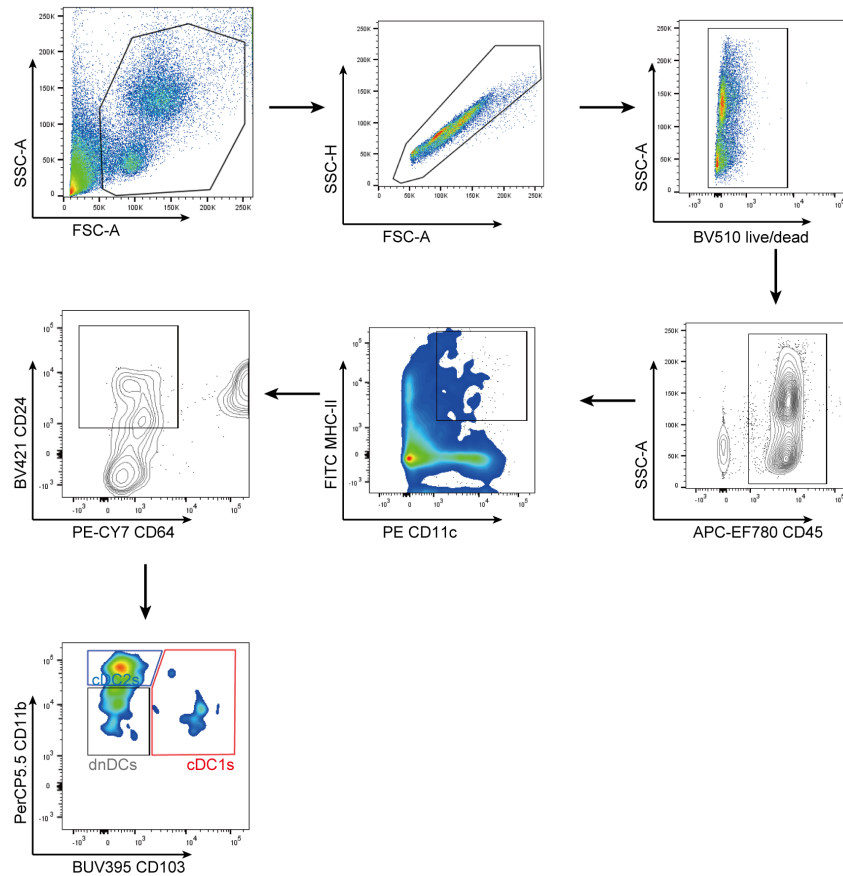

Supplementary Fig. 21. Flow cytometry gating strategy for the analysis of CD8<sup>+</sup> T cells, CD4<sup>+</sup> T cells (a), CD24<sup>+</sup>MHC II<sup>+</sup>DC-like cells and CD103<sup>+</sup> cDC1-like cells (b) in circulation (Fig. 6g).

**Supplementary Fig. 22**

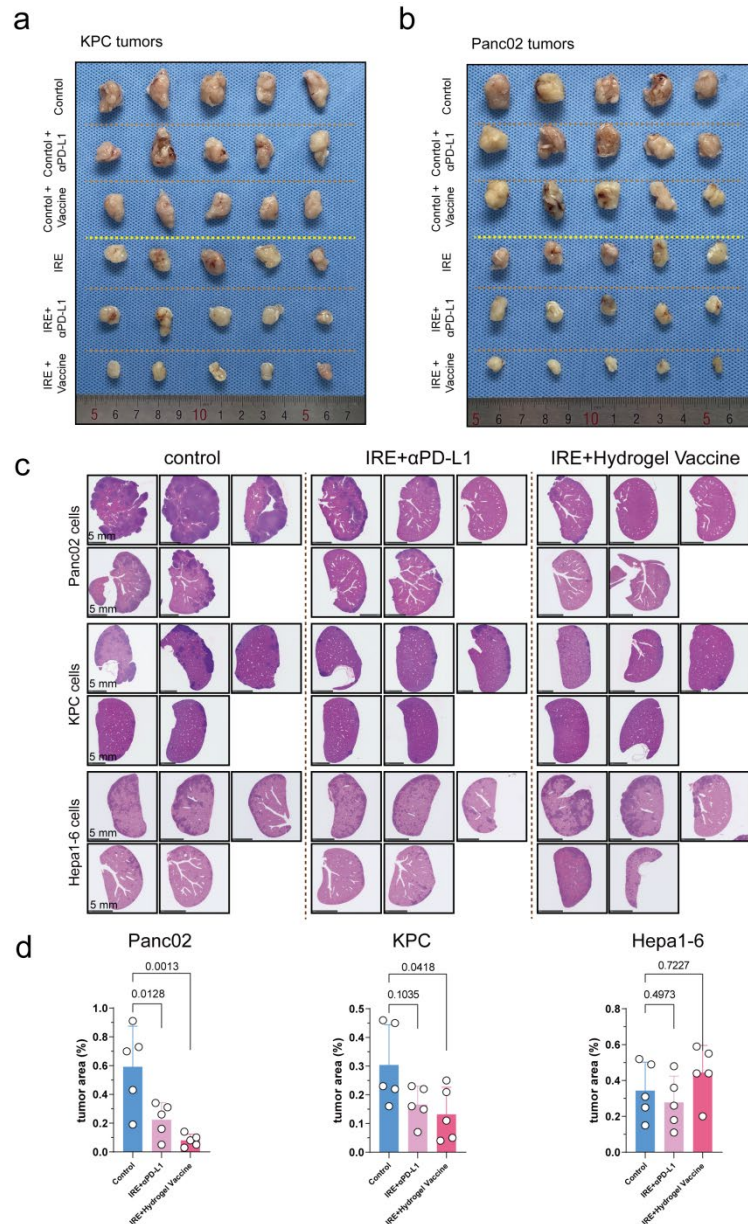

**Supplementary Fig. 22. Representative images show the gross distant metastasis tumours across different groups. (a, b)** Representative images show the subcutaneous metastasis KPC (a) and Panc02 (b) tumours across different treatment groups. (c) Representative images show the Panc02, KPC, and Hepa1-6 liver metastasis tumours across different groups. (d) Statistical analysis showed that the hydrogel microsphere vaccine combined with IRE ablation significantly the tumour area in KPC and Panc02 induced liver metastases. n=5 biologically independent samples. Data are presented as mean values +/- SEM. Two-tailed Dunnett t-test. Source data are provided as a Source data file.

**Supplementary Fig. 23**

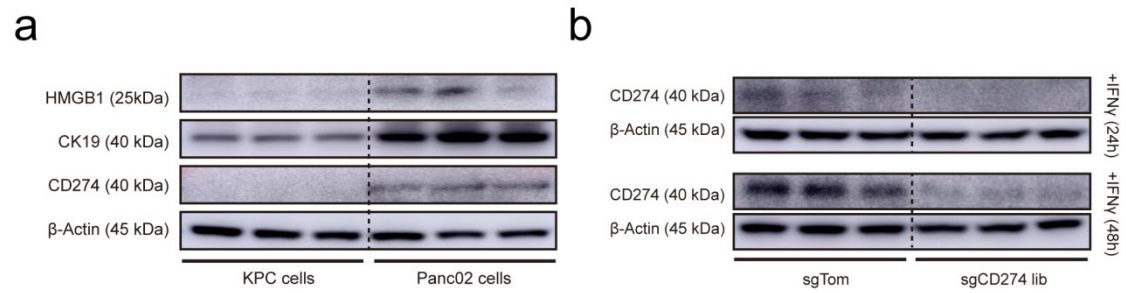

**Supplementary Fig. 23. Western Blot assay demonstrating the expression level molecular markers in KPC and Panc02 cells, and the expression of PD-L1 in IFN- $\gamma$  treatment Panc02 cells.**

(a) Western Blot assay demonstrating the expression level of HMGB1, CK19, and CD274 (PD-L1) in KPC and Panc02 cells. (b) The expression of PD-L1 in IFN- $\gamma$  treatment Panc02 cells. For a and b, 3 biologically independent samples were performed to confirm data stability. Source data are provided as a Source data file.

**Supplementary Table 1. Antibody information.**

| Antibodies   | Source | Reactivity                              | Provider                      | Catalog    | Application                 |
|--------------|--------|-----------------------------------------|-------------------------------|------------|-----------------------------|
| PD-L1        | Rat    | Mouse                                   | BioXCell                      | BP0101     | in vivo<br>treatment        |
| IgG1 isotype | Rat    | Mouse                                   | BioXCell                      | BP0090     | in vivo<br>treatment        |
| CD40         | Rat    | Mouse                                   | BioXCell                      | BP0016-2   | in vivo<br>treatment        |
| FLT3L        | Mouse  | Mouse                                   | Sino Biological               | 51113-M02H | in vivo<br>treatment        |
| CD8 $\beta$  | Rat    | Mouse                                   | BioXCell                      | BE0223     | in vivo<br>treatment        |
| MHC I        | Mouse  | Mouse                                   | BioXCell                      | BE0172     | in vivo<br>treatment        |
| CD45         | Mouse  | Human, Pig,<br>Mouse, Rat               | ProteinTech                   | 60287-1-Ig | IHC (1:4000),<br>IF (1:50)  |
| FoxP3        | Rabbit | Mouse, Monkey                           | Cell Signalling<br>Technology | 12653      | IHC ((1:200),<br>IF (1:400) |
| CD8          | Rabbit | Mouse                                   | Abcam                         | ab209775   | IHC (1:2000)                |
| CD4          | Rabbit | Mouse                                   | Abcam                         | ab183685   | IHC (1:1000)                |
| CD103        | Rabbit | Mouse, Rat,<br>Human                    | Abcam                         | ab224202   | IHC (1:1000)<br>IF (1:50)   |
| CK19         | Rabbit | Human, Mouse,<br>Rat, Dog, Goat,<br>Pig | ProteinTech                   | 10712-1-AP | IHC (1:3000),<br>IF (1:200) |
| CD31         | Rabbit | Mouse, Rat,<br>Human                    | Abcam                         | ab182981   | IHC (1:2000)<br>IF (1:100)  |
| CK19         | Mouse  | Human, Mouse,<br>Rat, Pig               | ProteinTech                   | 60187-1-Ig | WB (1:20000)                |



|                                      |        |                                                                                   |                               |            |              |
|--------------------------------------|--------|-----------------------------------------------------------------------------------|-------------------------------|------------|--------------|
| TNF- $\alpha$                        | Mouse  | Human, Mouse,<br>Rat, Bovine,<br>Chicken, Monkey,<br>Pig                          | ProteinTech                   | 60291-1-Ig | WB (1:1000)  |
| IFN- $\gamma$                        | Goat   | Mouse, Rat                                                                        | Invitrogen                    | PA1-24782  | WB (1:1000)  |
| HMGB1                                | Rabbit | Mouse, Rat,<br>Human                                                              | Abcam                         | ab18256    | WB (1:1000)  |
| SpCas9                               | Rabbit | Recombinant<br>fragment                                                           | Abcam                         | ab189380   | WB (1:20000) |
| $\beta$ -Actin                       | Mouse  | Human, Mouse,<br>Rat, Hamster, Dog                                                | Cell Signalling<br>Technology | 3700       | WB (1:1000)  |
| GAPDH                                | Mouse  | Mouse, Rat,<br>Chicken, Cow,<br>Human, Pig,<br>Xenopus laevis,<br>Chinese hamster | Abcam                         | ab9484     | WB (1:10000) |
| PD-L1                                | Mouse  | Human, Mouse,<br>Pig, Rat                                                         | ProteinTech                   | 66248-1-Ig | WB (1:2000)  |
| APC-eFluor <sup>TM</sup> 780<br>CD45 | Rat    | Human, Mouse                                                                      | eBioscience                   | 47-0451-82 | FC (1:50)    |
| FITC CD3                             | Rat    | Bacteria, Fungi,<br>Mouse, Rat                                                    | eBioscience                   | 11-0032-82 | FC (1:50)    |
| PE-Cyanine7 CD8A                     | Rat    | Human, Mouse                                                                      | eBioscience                   | 25-0081-81 | FC (1:50)    |
| BV421 CD4                            | Rat    | Mouse                                                                             | BD Biosciences                | 562891     | FC (1:50)    |
| PE-eFluor <sup>TM</sup> 610<br>CD11B | Rat    | Fish, Human,<br>Mouse                                                             | eBioscience                   | 61-0112-80 | FC (1:50)    |
| PE Ly-6G                             | Rat    | Mouse                                                                             | BD Biosciences                | 551461     | FC (1:50)    |
| APC NK-1.1                           | Mouse  | Mouse                                                                             | BD Biosciences                | 550627     | FC (1:50)    |



|                                        |                     |                                          |                |            |           |
|----------------------------------------|---------------------|------------------------------------------|----------------|------------|-----------|
| BUV395 CD273                           | Rat                 | Mouse                                    | BD Biosciences | 565102     | FC (1:50) |
| Brilliant Violet 711™<br>CD274         | Rat                 | Mouse                                    | Biolegend      | 124319     | FC (1:50) |
| PE CD25                                | Rat                 | Mouse, Rat                               | eBioscience    | 12-0251-82 | FC (1:50) |
| PE Granzyme B                          | Mouse               | Human, Mouse                             | Biolegend      | 372207     | FC (1:50) |
| APC FOXP3                              | Rat                 | Dog, Horse,<br>Human, Mouse,<br>Pig, Rat | eBioscience    | 17-5773-80 | FC (1:50) |
| V450 Ki-67                             | Mouse               | Human, Mouse                             | BD Biosciences | 561281     | FC (1:50) |
| Brilliant Violet 711™<br>TNF- $\alpha$ | Rat                 | Mouse                                    | Biolegend      | 506349     | FC (1:50) |
| BUV737 IFN- $\gamma$                   | Rat                 | Mouse                                    | BD Biosciences | 612769     | FC (1:50) |
| PE CD152                               | Armenian<br>Hamster | Mouse                                    | Biolegend      | 106305     | FC (1:50) |
| PerCP/Cyanine5.5<br>CD223 (LAG-3)      | Rat                 | Mouse                                    | Biolegend      | 125212     | FC (1:50) |
| Brilliant Violet 711™<br>CD366         | Rat                 | Mouse                                    | Biolegend      | 119727     | FC (1:50) |
| FITC I-A/I-E                           | Rat                 | Mouse                                    | Biolegend      | 107606     | FC (1:50) |
| PE/Cyanine7 CD64                       | Mouse               | Mouse                                    | Biolegend      | 139314     | FC (1:50) |
| Brilliant Violet 421™<br>CD24          | Rat                 | Mouse                                    | Biolegend      | 101826     | FC (1:50) |
| PE CD11c                               | Armenian<br>Hamster | Mouse                                    | Biolegend      | 117308     | FC (1:50) |
| APC H-2Kb bound to<br>SIINFEKL         | Mouse               | Mouse                                    | Biolegend      | 141605     | FC (1:50) |
| BUV395 CD103                           | Rat                 | Mouse                                    | BD Biosciences | 740238     | FC (1:50) |
| APC H-2Kd                              | Mouse               | Mouse                                    | Biolegend      | 116620     | FC (1:50) |

|                                |                     |              |                |            |           |
|--------------------------------|---------------------|--------------|----------------|------------|-----------|
| APC H-2Kb                      | Mouse               | Mouse        | Biolegend      | 116518     | FC (1:50) |
| APC CD86                       | Rat                 | Mouse        | Biolegend      | 105012     | FC (1:50) |
| Brilliant Violet 711™<br>CD80  | Armenian<br>Hamster | Mouse, Dog   | Biolegend      | 104743     | FC (1:50) |
| BUV737 CD40                    | Rat                 | Mouse        | BD Biosciences | 741749     | FC (1:50) |
| FITC CD80                      | Armenian<br>Hamster | Mouse, Dog   | BioLegend      | 104706     | FC (1:50) |
| PE/Cyanine7 CD86               | Rat                 | Mouse        | BioLegend      | 105014     | FC (1:50) |
| Brilliant Violet 421™<br>CD206 | Rat                 | Mouse        | BioLegend      | 141717     | FC (1:50) |
| PE CD163                       | Rat                 | Mouse        | BioLegend      | 155308     | FC (1:50) |
| PerCP-Cy™5.5<br>CD11b          | Rat                 | Human, Mouse | eBioscience    | 61-0112-80 | FC (1:50) |
| BUV395 F4/80                   | Rat                 | Mouse        | BD Biosciences | 565614     | FC (1:50) |
